# Supplementary material
Source: Elsevier journal article supplement (https://www.sciencedirect.com/science/article/pii/S0300893223001628)

**SUPPLEMENTARY DATA**

**Table 1 of the supplementary data**

Medication at discharge by sex

|                                  | Total (N = 2043) | Women (n = 483) | Men (n = 1560) |
|----------------------------------|------------------|-----------------|----------------|
| <i>Medication</i>                |                  |                 |                |
| Aspirin                          | 2025 (99.1)      | 478 (99)        | 1547 (99.2)    |
| P <sub>2</sub> Y <sub>12</sub> i | 2023 (99)        | 477 (98.8)      | 1546 (99.1)    |
| Clopidogrel                      | 1173 (58)        | 45 (72.3)       | 828 (53.6)     |
| Ticagrelor                       | 707 (34.9)       | 112 (23.5)      | 595 (38.5)     |
| Prasugrel                        | 143 (7.6)        | 20 (4.2)        | 123 (7.9)      |
| BB                               | 1900 (93)        | 454 (94)        | 1446 (92.7)    |
| ACEi/ARB                         | 1481 (72.5)      | 324 (67.1)      | 1157 (74.2)    |
| Statins                          | 2016 (98.7)      | 478 (99)        | 1538 (98.6)    |
| OAC                              | 168 (8.2)        | 32 (6.6)        | 136 (8.7)      |
| AVK                              | 53 (31.5)        | 11 (34.4)       | 42 (30.9)      |
| DOAC                             | 115 (68.5)       | 21 (65.6)       | 94 (69.1)      |
| MRA                              | 194 (9.5)        | 42 (8.7)        | 152 (8)        |

ACEi, angiotensin converting enzyme inhibitors; ARB, angiotensin receptor blockers; AVK, antivitamin K; BB, beta-blockers; DOAC, direct oral anticoagulants; MRA, mineralocorticoid receptor antagonists; OAC, oral anticoagulants; P<sub>2</sub>Y<sub>12</sub>i, inhibitors of the P<sub>2</sub>Y<sub>12</sub> receptor.

The data are expressed as No. (%).

**Table 2 of the supplementary data**

Death during the first 30 days, during the first year, and at the end of the follow-up and causes of death

|                                           | Total<br>(N = 2194) | Women (n = 528) | Men<br>(n = 1666) | P      |
|-------------------------------------------|---------------------|-----------------|-------------------|--------|
| <i>Deaths &lt; 30 d</i>                   |                     |                 |                   |        |
|                                           | 179 (8.2)           | 55 (7.4)        | 124 (1.4)         | .03    |
| <i>Deaths during the first year</i>       |                     |                 |                   |        |
|                                           | 254 (11.6)          | 75(14.2)        | 179 (1.7)         | .03    |
| <i>Deaths at the end of the follow-up</i> |                     |                 |                   |        |
|                                           | 468 (21.3)          | 140 (26.5)      | 329 (19.7)        | < .001 |
| <i>Causes of death</i>                    |                     |                 |                   |        |
| Acute MI                                  | 213 (45.4)          | 64 (45.7)       | 149 (45.3)        |        |
| Sudden death                              | 18 (3.8)            | 6 (4.3)         | 12 (3.7)          |        |
| Heart failure                             | 31 (6.6)            | 12 (8.6)        | 19 (5.8)          |        |
| Stroke                                    | 13 (2.8)            | 5 (3.6)         | 8 (2.4)           |        |
| Other CV cause                            | 5 (1.1)             | 1 (.7)          | 4 (1.2)           |        |
| Neoplasia                                 | 73 (15.6)           | 12 (8.6)        | 61 (18.5)         |        |
| Pulmonary                                 | 11 (2.4)            | 4 (2.9)         | 7 (2.1)           |        |
| Infections                                | 41 (8.7)            | 10 (7.1)        | 31 (9.4)          |        |
| Gastrointestinal                          | 13 (2.8)            | 6 (4.3)         | 7 (2.1)           |        |
| Accident/trauma                           | 8 (1.7)             | 3 (2.1)         | 5 (1.5)           |        |
| Other organ failure                       | 7 (1.5)             | 2 (1.4)         | 5 (1.5)           |        |
| Unknown                                   | 15 (3.2)            | 3 (2.1)         | 12 (3.7)          |        |
| Other non-CV                              | 9 (1.9)             | 7 (5)           | 2 (.6)            |        |
| COVID-19                                  | 12 (2.6)            | 5 (3.6)         | 7 (2.1)           |        |

CV, cardiovascular. COVID, coronavirus disease 2019; MI, myocardial infarction. The data are expressed as No. (%).

**Table 3 of the supplementary data**

Univariate and multivariable Cox regression analysis

|                               | Univariate |           |        | Multivariable |           |        |
|-------------------------------|------------|-----------|--------|---------------|-----------|--------|
|                               | HR         | 95%CI     | P      | HR            | 95%CI     | P      |
| <i>Sex (reference men)</i>    | 1.44       | 1.17-1.78 | .01    | .98           | 0.76-1.26 | .864   |
| <i>Age</i>                    | 1.07       | 1.06-1.08 | < .001 | 1.07          | 1.05-1.08 | < .001 |
| <i>Hypertension</i>           | 1.87       | 1.54-2.28 | < .001 | 1.11          | 0.87-1.40 | .401   |
| <i>Dyslipidemia</i>           | 1.03       | 0.84-1.25 | .790   |               |           |        |
| <i>Diabetes</i>               | 1.93       | 1.58-2.36 | < .001 | 1.24          | 0.98-1.58 | .075   |
| <i>Smoking</i>                | 0.52       | 0.43-0.63 | < .001 | 1.09          | 0.85-1.40 | .481   |
| <i>Chronic kidney disease</i> | 3.54       | 2.71-4.64 | < .001 | 1.52          | 1.12-2.08 | .008   |
| <i>IABP</i>                   | 3.69       | 2.80-4.85 | < .001 | 0.77          | 0.52-1.13 | .181   |
| <i>Multivessel disease</i>    | 1.66       | 1.37-2.06 | < .001 | 1.36          | 1.09-1.69 | .006   |
| <i>Killip Kimball class</i>   |            |           |        |               |           |        |
| - I                           |            |           |        |               |           |        |
| - II                          | 3.18       | 2.36-4.27 | < .001 | 1.48          | 1.06-2.05 | .021   |
| - III                         | 4.26       | 2.76-6.56 | < .001 | 1.50          | 0.93-2.43 | .094   |
| - IV                          | 7.69       | 6.11-9.68 | < .001 | 4.79          | 3.39-6.75 | < .001 |
| <i>LVEF</i>                   | 0.94       | 0.93-0.95 | < .001 | 0.98          | 0.97-0.99 | < .001 |
| <i>Previous MI</i>            | 1.66       | 1.28-2.15 | < .001 | 0.71          | 0.44-1.14 | .160   |
| <i>Previous PCI</i>           | 1.40       | 1.03-1.89 | .030   | 1.18          | 0.69-2.01 | .548   |
| <i>Femoral access</i>         | 2.50       | 2.06-3.03 | < .001 | 1.26          | 1.00-1.60 | .052   |
| <i>Failed PCI</i>             | 2.41       | 1.61-3.61 | < .001 | 1.13          | 0.65-1.94 | .667   |
| <i>HS-cTnT</i>                | 1.02       | 1.02-1.03 | < .001 | 1.01          | 1.01-1.02 | .001   |
| <i>CI-AKI</i>                 | 2.81       | 2.31-3.41 | < .001 | 1.59          | 1.26-2.02 | < .001 |

CI-AKI, contrast-induced acute kidney injury; HS-cTnT, high-sensitivity cardiac troponin T; IABP, intra-aortic balloon pump; LVEF, left ventricle ejection fraction; MI, myocardial infarction; PCI, percutaneous coronary intervention.

**Figure 1 of the supplementary data.** Kaplan-Meier curves showing survival in women and men at the end of the follow-up.

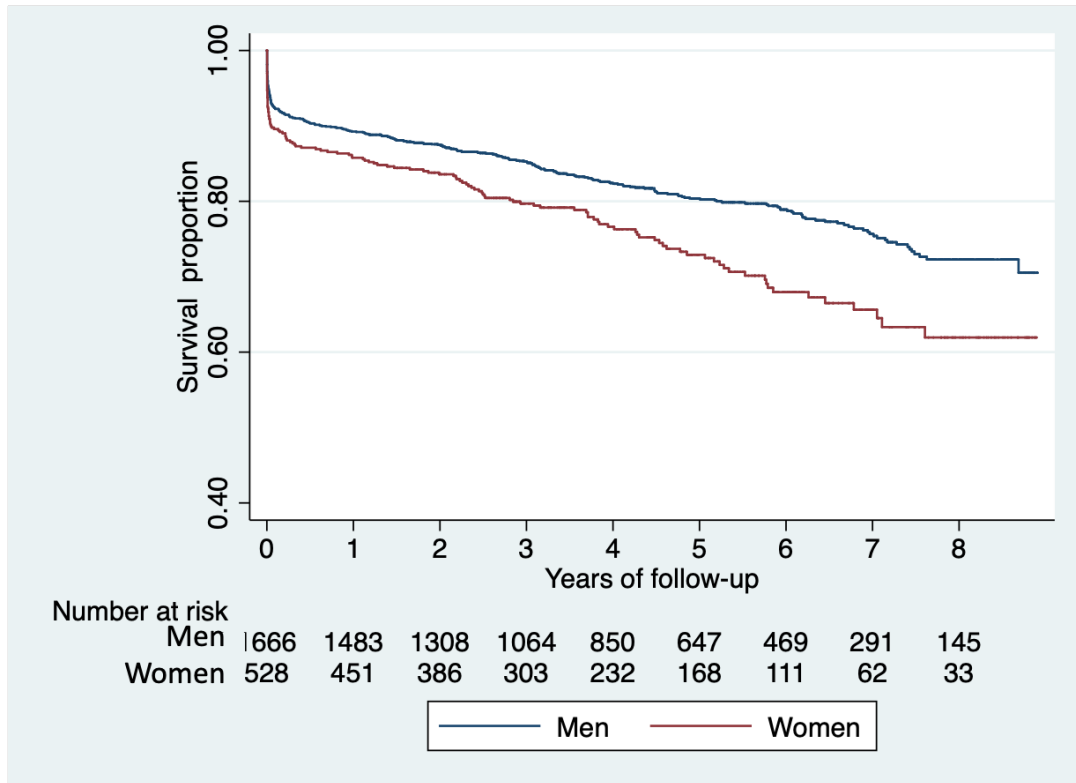

Supplement: mmc1 [file mmc1.pdf]
